# Supplementary material for: COVID-19-Induced Acute Respiratory Distress Syndrome Treated with Hyperbaric Oxygen: Interim Safety Report from a Randomized Clinical Trial (COVID-19-HBO)
Source: MDPI journal article supplement (doi:10.3390/jcm12144850), 2023-07-24
Supplement: s1 [file s1]

**Table S1. Overview of Adverse Events**

| Group  |     |               |     |                         |     |
|--------|-----|---------------|-----|-------------------------|-----|
|        |     | Best practice |     | Hyperbaric oxygen (HBO) |     |
| Count  | Sum | Count         | Sum | Count                   | Sum |
| AEFREQ | 1 1 | 13            | 55  | 14                      | 40  |

**Table S2. Summary of Adverse Events by System Organ Class and Preferred Term**

|     |                                                      | Group         |                         |
|-----|------------------------------------------------------|---------------|-------------------------|
|     |                                                      | Best practice | Hyperbaric oxygen (HBO) |
|     |                                                      | Count         | Count                   |
| SOC |                                                      |               |                         |
|     | Cardiac disorder                                     | 0             | 2                       |
|     | Cardiac disorders                                    | 0             | 1                       |
|     | Ear and labyrinth disorders                          | 0             | 1                       |
|     | General disorders and administration site conditions | 0             | 0                       |
|     | Infections and infestaions                           | 0             | 1                       |
|     | Infections and infestations                          | 0             | 1                       |
|     | Metabolism and nutrition disorders                   | 0             | 2                       |
|     | Nervous system disorders                             | 0             | 0                       |
|     | Psychiatric disorders                                | 0             | 1                       |
|     | Respiratory, thoracic and mediastinal disorders      | 0             | 3                       |
|     | Vascular disorders                                   | 0             | 1                       |
| PT  |                                                      |               |                         |
|     | Abscess                                              | 0             | 1                       |
|     | Anxiety                                              | 0             | 1                       |
|     | Atrial fibrillation                                  | 0             | 2                       |
|     | Bacteremia                                           | 0             | 1                       |
|     | Bradycardia                                          | 0             | 1                       |
|     | Cardiogenic Shock                                    | 0             | 0                       |
|     | Chest pain                                           | 0             | 0                       |
|     | Claustrophobia                                       | 0             | 0                       |

|                           |   |   |   |
|---------------------------|---|---|---|
| Cough                     | 0 | 1 | 0 |
| Depression                | 0 | 0 | 1 |
| Diabetes mellitus         | 0 | 2 | 0 |
| Ear pain                  | 0 | 1 | 1 |
| Fever                     | 0 | 0 | 1 |
| Fungal infection          | 0 | 0 | 1 |
| Headache                  | 0 | 0 | 1 |
| Hypotension               | 0 | 1 | 1 |
| Hypoxia                   | 0 | 2 | 4 |
| Ventricular extrasystoles | 0 | 0 | 1 |

**Table S3. Summary of Adverse Events by Severity, SOC and PT.**

|          |    |    |                                                      |                           | Group         |                         |       |
|----------|----|----|------------------------------------------------------|---------------------------|---------------|-------------------------|-------|
|          |    |    |                                                      |                           | Best practice | Hyperbaric oxygen (HBO) |       |
|          |    |    |                                                      |                           | Count         | Count                   | Count |
| Severity | SO | PT |                                                      |                           |               |                         |       |
| Mild     | SO | PT | Cardiac disorder                                     | Atrial fibrillation       | 0             | 1                       | 0     |
|          | C  | PT | Cardiac disorders                                    | Bradycardia               | 0             | 1                       | 0     |
|          |    |    |                                                      | Chest pain                | 0             | 0                       | 1     |
|          |    |    |                                                      | Ventricular extrasystoles | 0             | 0                       | 1     |
|          |    | PT | Ear and labyrinth disorders                          | Ear pain                  | 0             | 1                       | 1     |
|          |    | PT | General disorders and administration site conditions | Fever                     | 0             | 0                       | 1     |
|          |    | PT | Infections and infestations                          | Abscess                   | 0             | 1                       | 0     |
|          |    |    |                                                      | Fungal infection          | 0             | 0                       | 1     |
|          |    | PT | Metabolism and nutrition disorders                   | Diabetes mellitus         | 0             | 2                       | 0     |
|          |    | PT | Nervous system disorders                             | Headache                  | 0             | 0                       | 1     |
|          |    | PT | Psychiatric disorders                                | Claustrophobia            | 0             | 0                       | 1     |
|          |    | PT | Respiratory, thoracic and mediastinal disorders      | Cough                     | 0             | 1                       | 0     |

|          |         |                                                 |    |                     |   |   |   |
|----------|---------|-------------------------------------------------|----|---------------------|---|---|---|
| Moderate | SO<br>C | Vascular disorders                              | PT | Hypotension         | 0 | 1 | 0 |
|          |         | Cardiac disorder                                | PT | Atrial fibrillation | 0 | 1 | 0 |
|          |         | Infections and infestaions                      | PT | Bacteremia          | 0 | 1 | 0 |
|          |         | Psychiatric disorders                           | PT | Anxiety             | 0 | 1 | 0 |
|          |         |                                                 |    | Depression          | 0 | 0 | 1 |
| Severe   | SO      | Respiratory, thoracic and mediastinal disorders | PT | Hypoxia             | 0 | 2 | 4 |
|          |         | Vascular disorders                              | PT | Hypotension         | 0 | 0 | 1 |
|          |         | Cardiac disorders                               | PT | Cardiogenic         | 0 | 0 | 1 |
|          |         |                                                 |    |                     |   |   |   |

**Table S4. Overview of Serious Adverse Events**

| Group         |      |                         |     |  |
|---------------|------|-------------------------|-----|--|
| Best practice |      | Hyperbaric oxygen (HBO) |     |  |
| Count         | Sum  | Count                   | Sum |  |
| SAEFREQ       | 6 14 | 6                       | 9   |  |

**Table S5. Summary of Serious Adverse Events by System Organ Class and Preferred Term**

|     |                                                 |    |                   | Group         |              |
|-----|-------------------------------------------------|----|-------------------|---------------|--------------|
|     |                                                 |    |                   | Best practice | Hyperbaric   |
|     |                                                 |    |                   | Count         | oxygen (HBO) |
|     |                                                 |    |                   |               | Count        |
| SOC | Cardiac disorders                               | PT | Cardiac arrest    | 1             | 0            |
|     |                                                 |    | Cardiogenic Shock | 0             | 1            |
|     | Infections and infestations                     | PT | Pneumonia         | 4             | 0            |
|     |                                                 |    |                   |               |              |
|     | Respiratory, thoracic and mediastinal disorders | PT | Hypoxia           | 7             | 7            |
|     |                                                 |    | Pneumothorax      | 1             | 0            |
|     | Vascular disorders                              | PT | Hypotension       | 1             | 1            |
|     |                                                 |    |                   |               |              |

**Table S6. Summary of Serious Adverse Events by Severity, SOC and PT.**

| Severity |          |     |                                                 |    |                | Group                  |                                     |
|----------|----------|-----|-------------------------------------------------|----|----------------|------------------------|-------------------------------------|
|          |          |     |                                                 |    |                | Best practice<br>Count | Hyperbaric<br>oxygen (HBO)<br>Count |
| Severity | Mild     | SOC | Infections and infestations                     | PT | Pneumonia      | 1                      | 0                                   |
|          |          |     | Respiratory, thoracic and mediastinal disorders | PT | Hypoxia        | 0                      | 1                                   |
|          |          |     |                                                 |    | Pneumothorax   | 1                      | 0                                   |
|          | Moderate | SOC | Vascular disorders                              | PT | Hypotension    | 0                      | 1                                   |
|          |          |     | Infections and infestations                     | PT | Pneumonia      | 3                      | 0                                   |
|          |          |     | Respiratory, thoracic and mediastinal disorders | PT | Hypoxia        | 6                      | 3                                   |
|          | Severe   | SOC | Cardiac disorders                               | PT | Cardiac arrest | 1                      | 0                                   |
|          |          |     |                                                 |    | Cardiogenic    | 0                      | 1                                   |
|          |          |     | Respiratory, thoracic and mediastinal disorders | PT | Hypoxia        | 1                      | 3                                   |
|          |          |     | Vascular disorders                              | PT | Hypotension    | 1                      | 0                                   |
